# Supplementary material for: White light emission from a two-component hybrid gel via an energy transfer process
Source: Royal Society of Chemistry journal article supplement (doi:10.1039/c5cp05232g), 2015-01-01
Supplement: c5cp05232g1.pdf [file c5cp05232g1.pdf]

**Electronic Supplementary Information for**

**White light emission from two-component hybrid gel via  
energy transfer process**

**Xinhua Cao,<sup>a,b</sup> Haichuang Lan,<sup>b</sup> Zhenhua Li,<sup>b</sup> Yueyuan Mao,<sup>b</sup> Liming Chen,<sup>b</sup>  
Yongquan Wu,<sup>b</sup> Tao Yi<sup>\*b</sup>**

<sup>a</sup>College of Chemistry and Chemical Engineering, Xinyang Normal University,  
Xinyang 464000, China

<sup>b</sup>Department of Chemistry and Collaborative Innovation Center of Energy Materials,  
Fudan University, Shanghai 200433, China

**Table S1.** Gelation properties of compound **1**, **1-Ir** (0.5 eq) in various solvents.<sup>a</sup>

| solvent              | <b>1</b> | <b>1-Ir</b> |
|----------------------|----------|-------------|
| ethyl acetate        | G        | G'          |
| cyclohexane          | G        | G'          |
| petroleum ether      | G        | G'          |
| acetonitrile         | G        | G           |
| methanol             | G        | G           |
| toluene              | G        | G'          |
| acetone              | G        | G'          |
| ethanol              | G        | G'          |
| tetrahydrofuran      | G        | G'          |
| dioxane              | G        | S           |
| dichloromethane      | G        | G'          |
| chloroform           | S        | S           |
| carbon tetrachloride | G        | G'          |
| dimethyl sulfoxide   | G        | G           |
| Dimethyl formamide   | PG       | G           |
| hexane               | G        | G'          |
| liquid paraffin      | G        | G'          |
| propanol             | G        | G'          |
| 1-hexanol            | G        | G'          |

<sup>a</sup>S = solution; PG = partial gel; G = gel; G' = gel with existence of insoluble solid **Ir**; [**1**] = 25 mg mL<sup>-1</sup>; [**1+Ir**] = 25 mg mL<sup>-1</sup>.

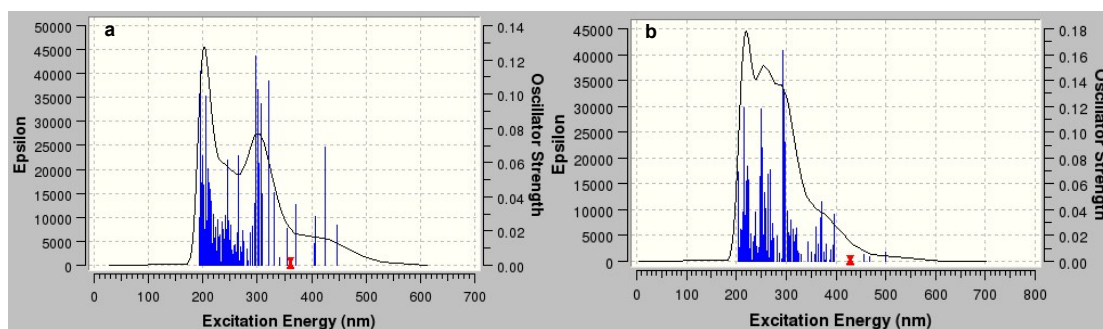

**Figure S1** The absorption spectra of the two complexes obtained from the DFT calculation: a) for complex **Ir** ( $[\text{Ir}(\text{bt})_2(\text{acac})]$ ); b) for  $[\text{Ir}(\text{pba})_2(\text{Phen})]\text{PF}_6$ .

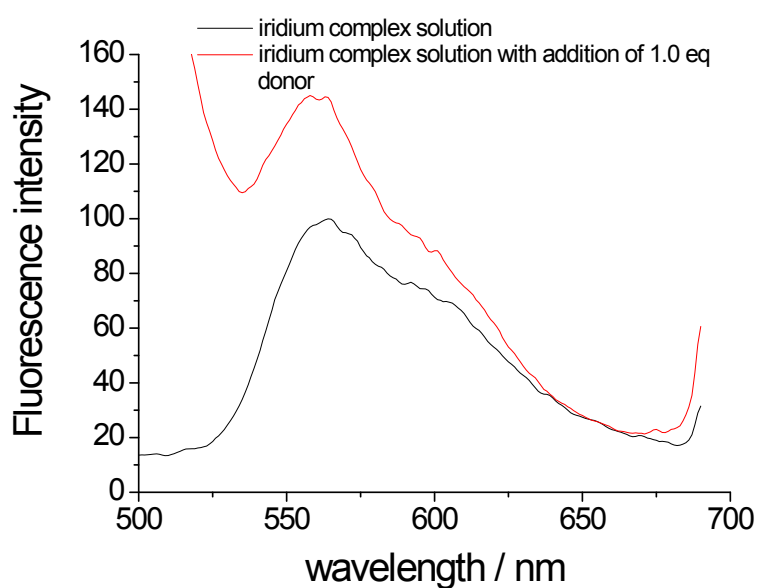

**Figure S2** The fluorescence emission spectrum of **Ir** without and with 1.0 eq of **1** with the excitation of 356 nm ( $C = 1.0 \times 10^{-5}$  M).

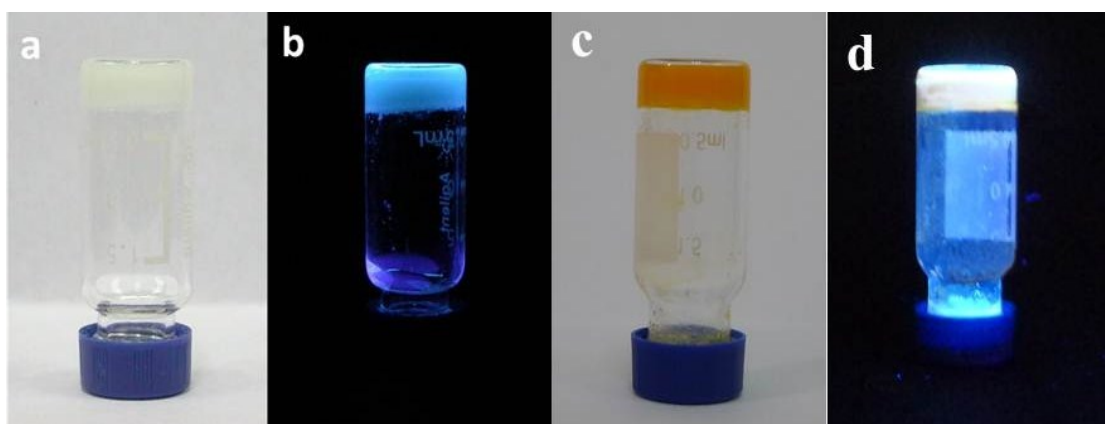

**Figure S3.** Images of gels **1** (a and b) and **1-Ir** (c and d); a and c, under a bright lamp; b and d, in the dark under illumination of 365 nm light ( $c_1 = 25$  mg  $\text{mL}^{-1}$ ).

**Efficiency of energy transfer (E) can be obtained from following equation:**

$$E = 1 - \frac{\tau_{DA}}{\tau_D}$$

In this equation,  $\tau_{DA}$  is the fluorescence lifetime of the donor in the presence of the acceptor and  $\tau_D$  is the fluorescence lifetime of the donor in the absence of the acceptor.

**The equation used to fit the exponential decay curve:**

$$Fit = A + B_1 \cdot e^{-t/\tau_1} + B_2 \cdot e^{-t/\tau_2} + B_3 \cdot e^{-t/\tau_3} + B_4 \cdot e^{-t/\tau_4}$$

**The equation formula used to calculate the overlapping integral (J) and the distance between donor and acceptor (r):**

$$J = \int_0^{\infty} d\nu \frac{f_D(\nu)\epsilon_A(\nu)}{\nu^4}$$

In this equation,  $f_D(\nu)$  is the fluorescence emission of donor under normalization,  $\epsilon_a(\nu)$  is the molar extinction coefficient at wavelength of  $\nu$ .

$$E = R_0^6 / (r^6 + R_0^6)$$

$E$  is the Energy transfer efficiency;  $R_0$  is the critical distance of Förster energy transfer;  $r$  is the actual distance between molecules

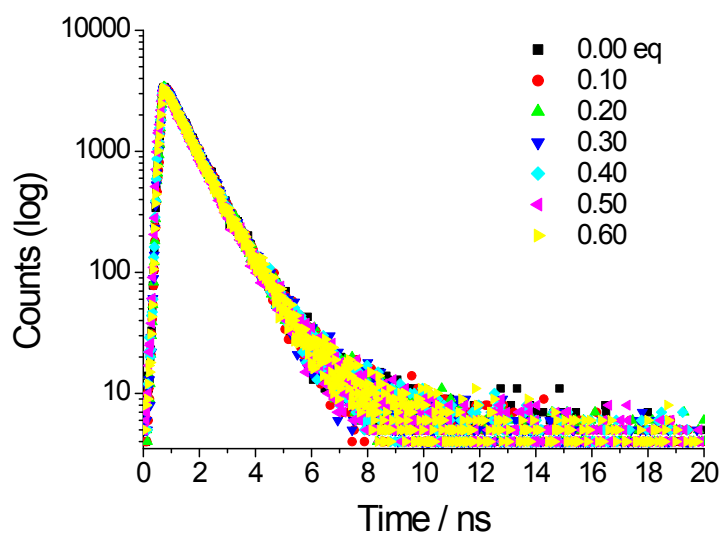

**Figure S4** Lifetime decay profiles ( $\lambda_{ex} = 356$  nm, monitored at 430 nm) of **1** solution under addition of different amounts of **Ir** (0 – 0.6 eq) in acetonitrile ( $c = 1.0 \times 10^{-5}$  M).

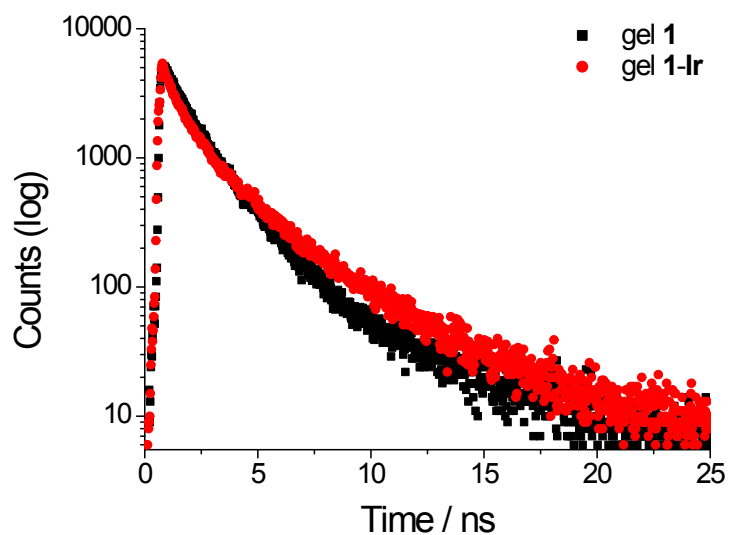

**Figure S5** Lifetime decay profiles ( $\lambda_{\text{ex}} = 356 \text{ nm}$ , monitored at  $430 \text{ nm}$ ) of gel **1** ( $25 \text{ mg mL}^{-1}$ ) and **1-Ir** (0.5 eq) gel in acetonitrile.

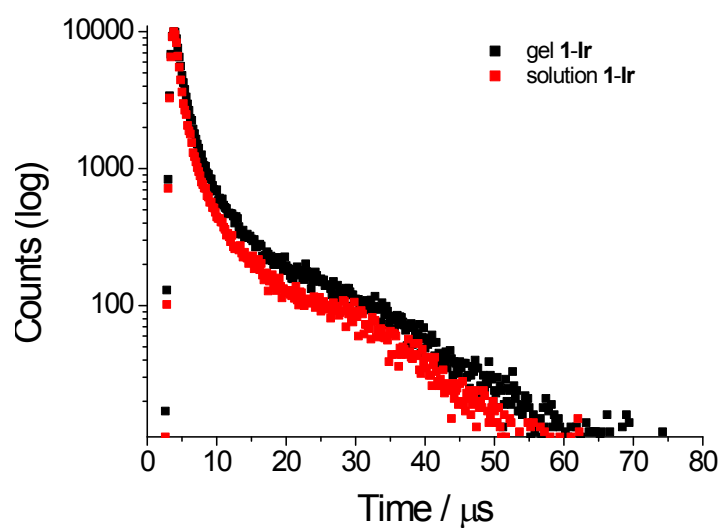

**Figure S6** Lifetime decay profiles ( $\lambda_{\text{ex}} = 356 \text{ nm}$ , monitored at  $563 \text{ nm}$ ) of gel **1-Ir** ( $25 \text{ mg mL}^{-1}$ ) and **1-Ir** solution in acetonitrile ( $c_1 = 4 \times 10^{-5} \text{ M}$ ,  $c_{\text{Ir}} = 2 \times 10^{-5} \text{ M}$ ).

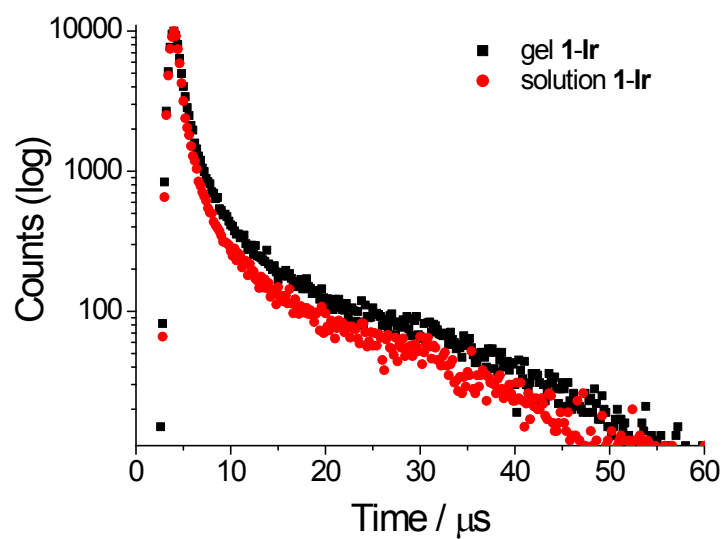

**Figure S7** Lifetime decay profiles ( $\lambda_{\text{exc}} = 430 \text{ nm}$ , monitored at  $563 \text{ nm}$ ) of gel **1-Ir** ( $25 \text{ mg mL}^{-1}$ ) and **1-Ir** solution in acetonitrile ( $c_{\text{I}} = 4 \times 10^{-5} \text{ M}$ ,  $c_{\text{Ir}} = 2 \times 10^{-5} \text{ M}$ ).
